# Supplementary material for: Synthesis and Biological Assessment of Triazolo-Quinazoline Carbothioamide Derivatives for p38 MAP Kinase Inhibition: In-Silico and In-Vitro Approaches
Source: Research Square preprint supplement (doi:10.21203/rs.3.rs-5053758/v1), 2024-10-16
Supplement: Supplementary file 1 [file 05246810e2edcff606b8c349.docx]

**Supplementary data**

**Synthesis and Biological Assessment of Triazolo-Quinazoline Carbothioamide Derivatives for p38 MAP Kinase Inhibition: *In-Silico* and *In-Vitro* Approaches**

**1H NMR of** **4-methyl-5-oxo-N-(pyridin-3-yl)-4,5-dihydro-[1,2,3]triazolo[1,5-a]quinazoline-3-carbothioamide (8a)**


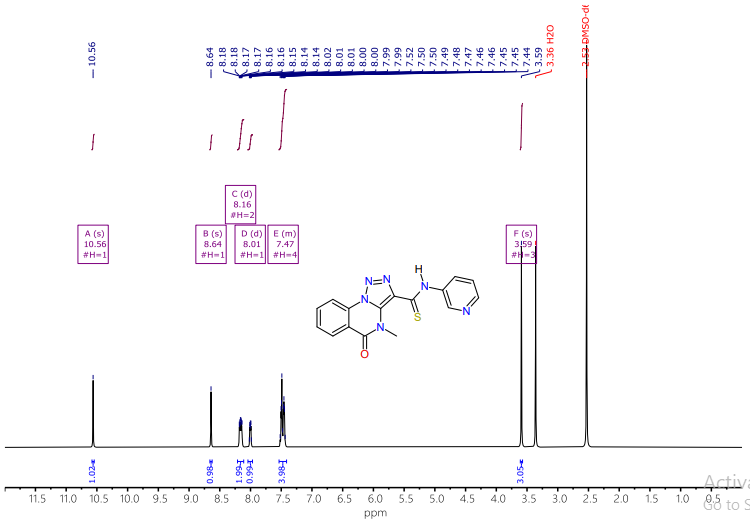


**13C NMR of** **4-methyl-5-oxo-N-(pyridin-3-yl)-4,5-dihydro-[1,2,3]triazolo[1,5-a]quinazoline-3-carbothioamide (8a)**


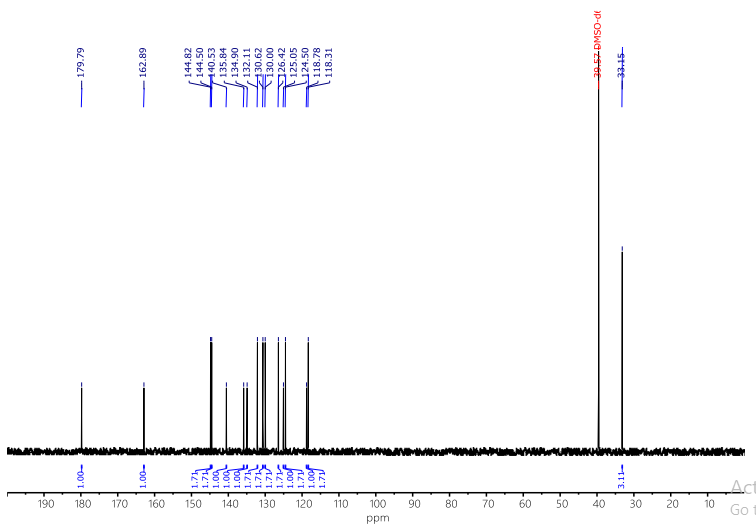


**13C NMR of** **4-methyl-5-oxo-N-(pyridin-3-yl)-4,5-dihydro-[1,2,3]triazolo[1,5-a]quinazoline-3-carbothioamide (8a)**


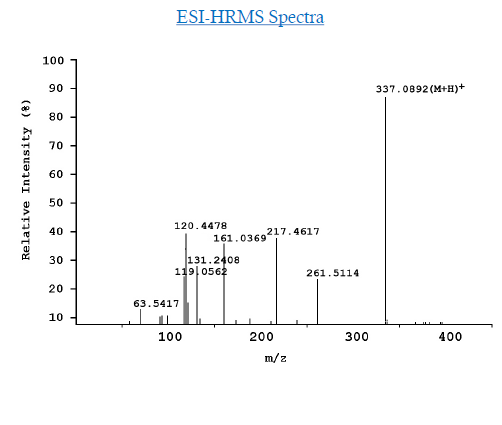


ESI-HRMS (m/z), of (C16H12N6OS)

Calcd: 337.0866 [M+H]+

Found: 337.0892 [M+H]+

**1H NMR of** **7-methoxy-4-methyl-5-oxo-N-(pyridin-3-yl)-4,5-dihydro-[1,2,3]triazolo[1,5-a]quinazoline-3-carbothioamide (8b)**


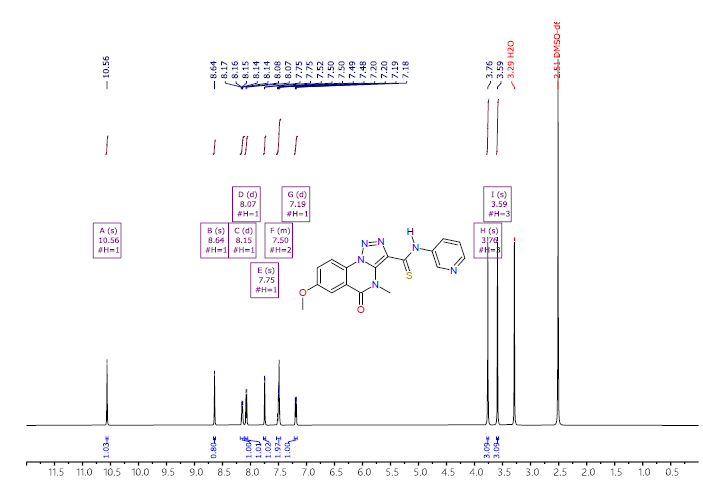


**13C NMR of** **7-methoxy-4-methyl-5-oxo-N-(pyridin-3-yl)-4,5-dihydro-[1,2,3]triazolo[1,5-a]quinazoline-3-carbothioamide (8b)**


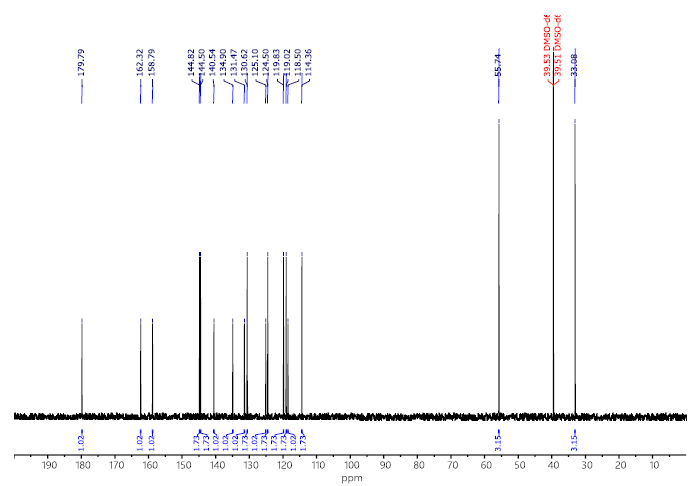


**HRMS of** **7-methoxy-4-methyl-5-oxo-N-(pyridin-3-yl)-4,5-dihydro-[1,2,3]triazolo[1,5-a]quinazoline-3-carbothioamide (8b)**

**
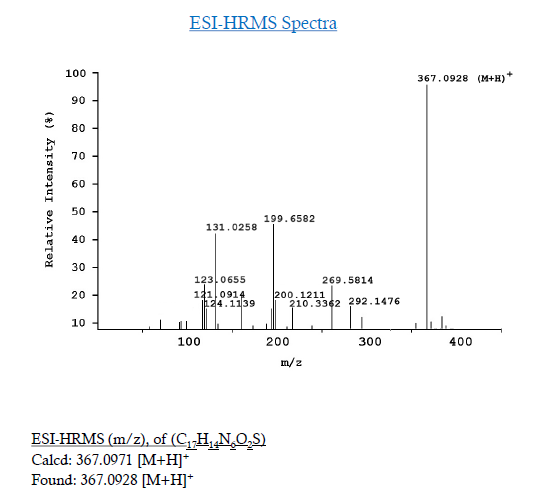
**

**1H NMR of** **N-(5-chloropyridin-3-yl)-7-methoxy-4-methyl-5-oxo-4,5-dihydro-[1,2,3]triazolo[1,5-a]quinazoline-3-carbothioamide (8c)**

**
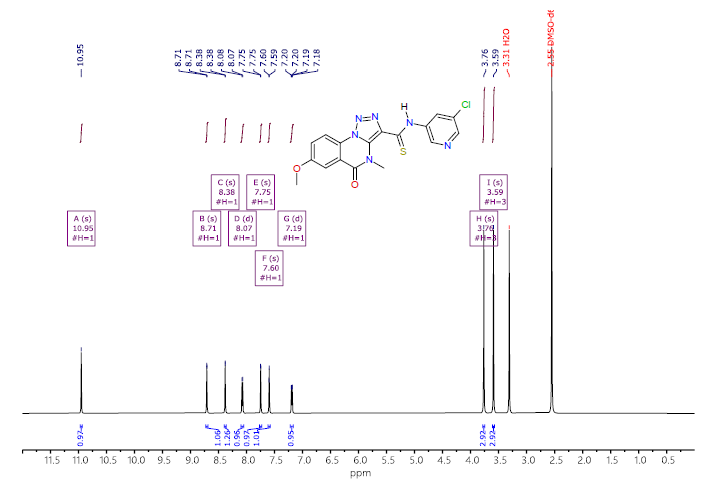
**

**13C NMR of** **N-(5-chloropyridin-3-yl)-7-methoxy-4-methyl-5-oxo-4,5-dihydro-[1,2,3]triazolo[1,5-a]quinazoline-3-carbothioamide (8c)**


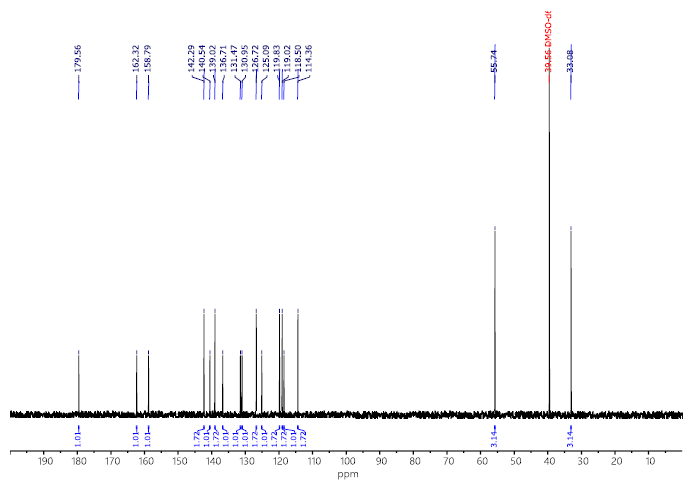


**HRMS of** **N-(5-chloropyridin-3-yl)-7-methoxy-4-methyl-5-oxo-4,5-dihydro-[1,2,3]triazolo[1,5-a]quinazoline-3-carbothioamide (8c)**


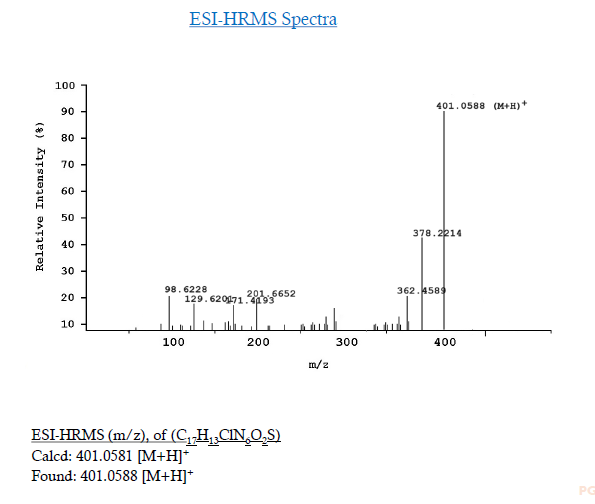


**1H NMR N-(4-bromopyridin-3-yl)-7-methoxy-4-methyl-5-oxo-4,5-dihydro-[1,2,3]triazolo[1,5-a]quinazoline-3-carbothioamide (8d)**


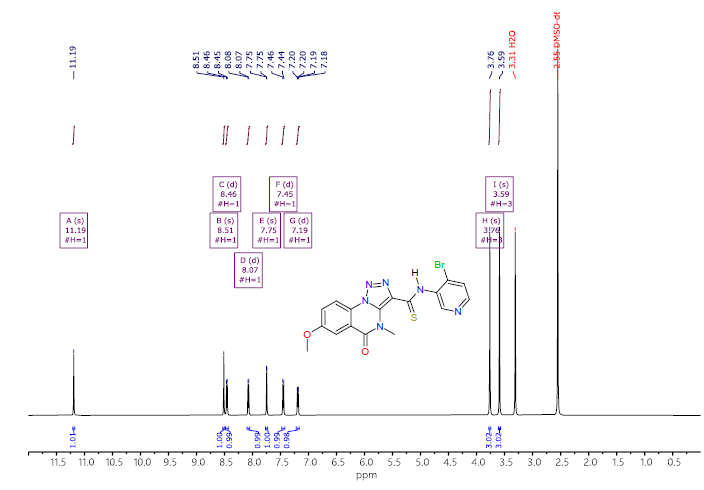


**13C NMR N-(4-bromopyridin-3-yl)-7-methoxy-4-methyl-5-oxo-4,5-dihydro-[1,2,3]triazolo[1,5-a]quinazoline-3-carbothioamide (8d)**


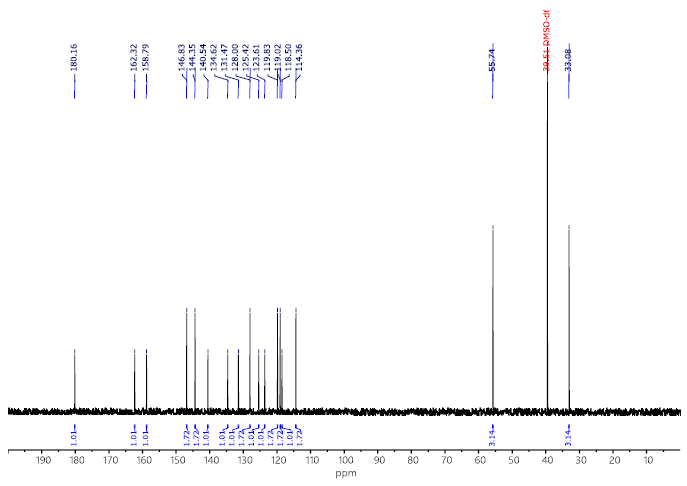


**HRMS N-(4-bromopyridin-3-yl)-7-methoxy-4-methyl-5-oxo-4,5-dihydro-[1,2,3]triazolo[1,5-a]quinazoline-3-carbothioamide (8d)**


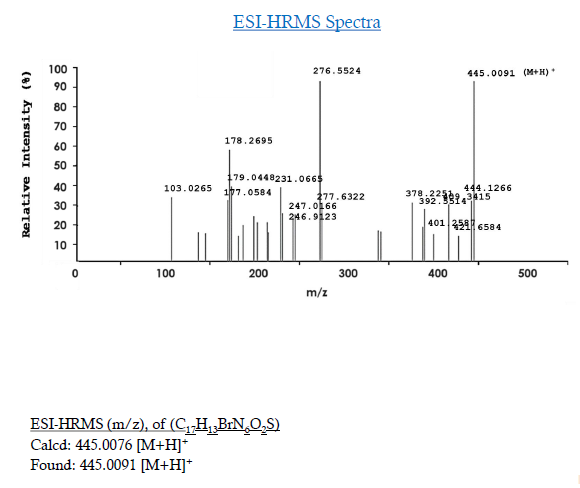


**1H NMR N-(6-acetylpyridin-3-yl)-4-methyl-5-oxo-7-(trifluoromethyl)-4,5-dihydro-[1,2,3]triazolo[1,5-a]quinazoline-3-carbothioamide (8e)**


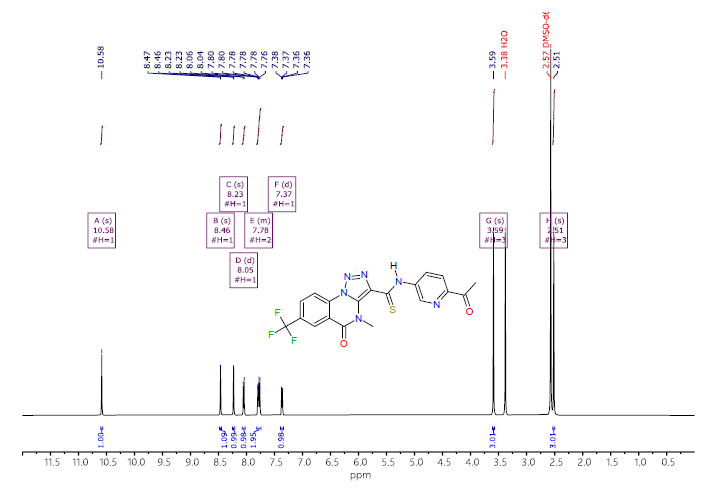


**13C NMR N-(6-acetylpyridin-3-yl)-4-methyl-5-oxo-7-(trifluoromethyl)-4,5-dihydro-[1,2,3]triazolo[1,5-a]quinazoline-3-carbothioamide (8e)**


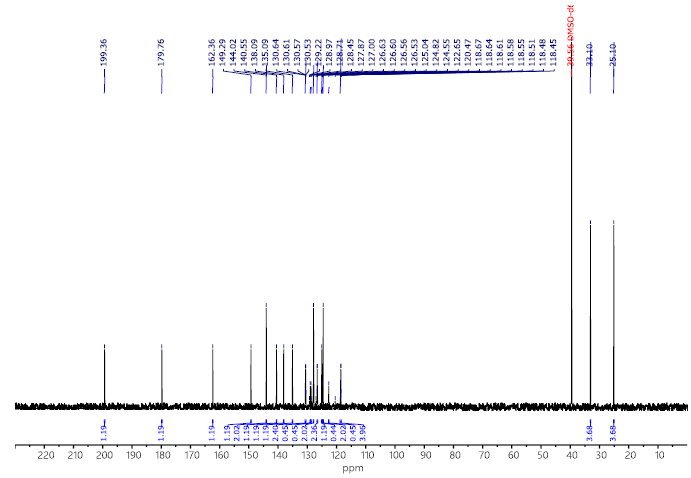


**HRMS N-(6-acetylpyridin-3-yl)-4-methyl-5-oxo-7-(trifluoromethyl)-4,5-dihydro-[1,2,3]triazolo[1,5-a]quinazoline-3-carbothioamide (8e)**


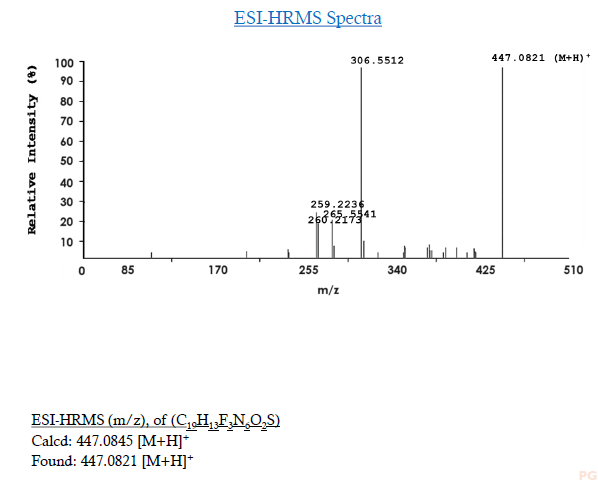


**1H NMR of 7-(dimethylglycyl)-4-methyl-5-oxo-N-(5-(trifluoromethyl)pyridin-3-yl)-4,5-dihydro-[1,2,3]triazolo[1,5-a]quinazoline-3-carbothioamide (8f)**


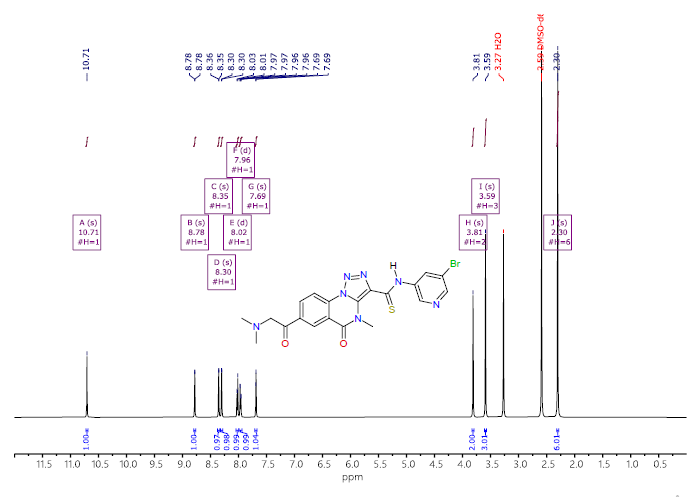


**13C NMR 7-(dimethylglycyl)-4-methyl-5-oxo-N-(5-(trifluoromethyl)pyridin-3-yl)-4,5-dihydro-[1,2,3]triazolo[1,5-a]quinazoline-3-carbothioamide (8f)**


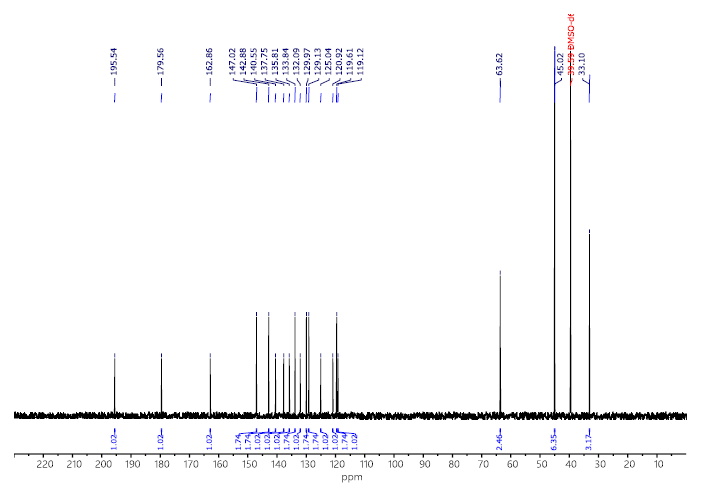


**HRMS of 7-(dimethylglycyl)-4-methyl-5-oxo-N-(5-(trifluoromethyl)pyridin-3-yl)-4,5-dihydro-[1,2,3]triazolo[1,5-a]quinazoline-3-carbothioamide (8f)**


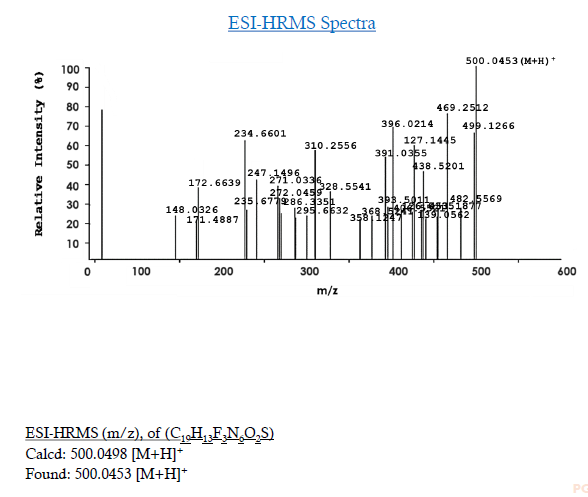


**1H NMR of 7-(dimethylglycyl)-4-methyl-N-(4-methylpyridin-3-yl)-5-oxo-4,5-dihydro-[1,2,3]triazolo[1,5-a]quinazoline-3-carbothioamide (8g)**


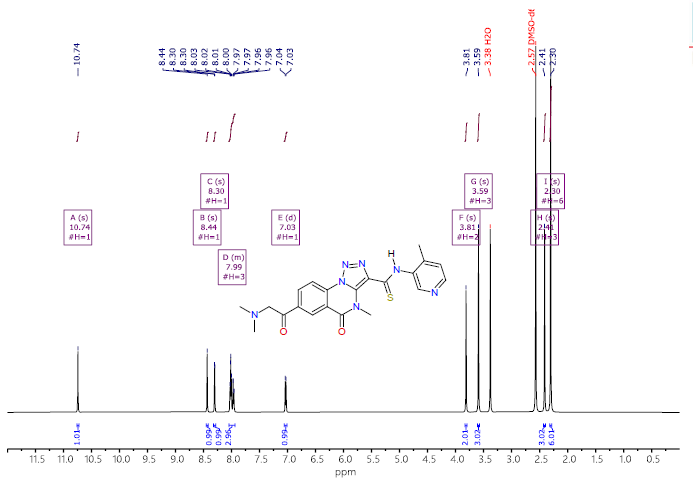


**13C NMR of 7-(dimethylglycyl)-4-methyl-N-(4-methylpyridin-3-yl)-5-oxo-4,5-dihydro-[1,2,3]triazolo[1,5-a]quinazoline-3-carbothioamide (8g)**


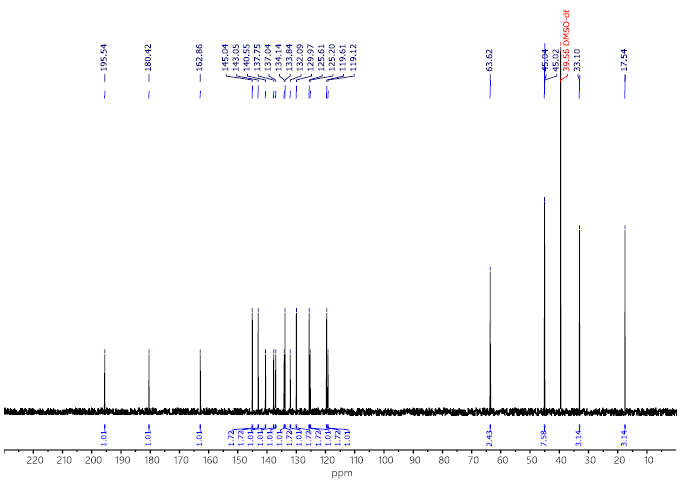


**HRMS of 7-(dimethylglycyl)-4-methyl-N-(4-methylpyridin-3-yl)-5-oxo-4,5-dihydro-[1,2,3]triazolo[1,5-a]quinazoline-3-carbothioamide (8g)**


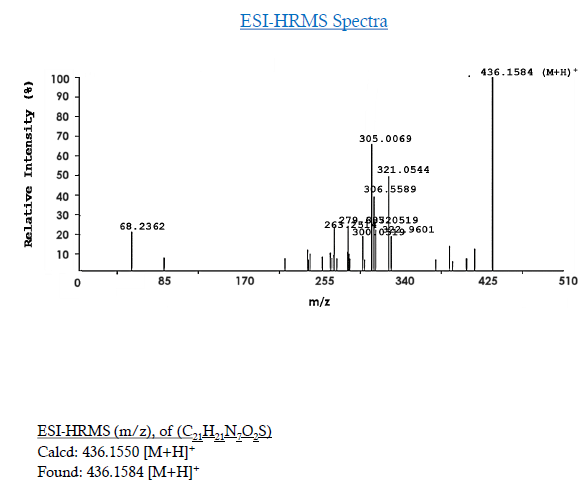


**1H NMR of 7-(dimethylglycyl)-4-methyl-5-oxo-N-(5-(trifluoromethyl)pyridin-3-yl)-4,5-dihydro-[1,2,3]triazolo[1,5-a]quinazoline-3-carbothioamide (8h)**


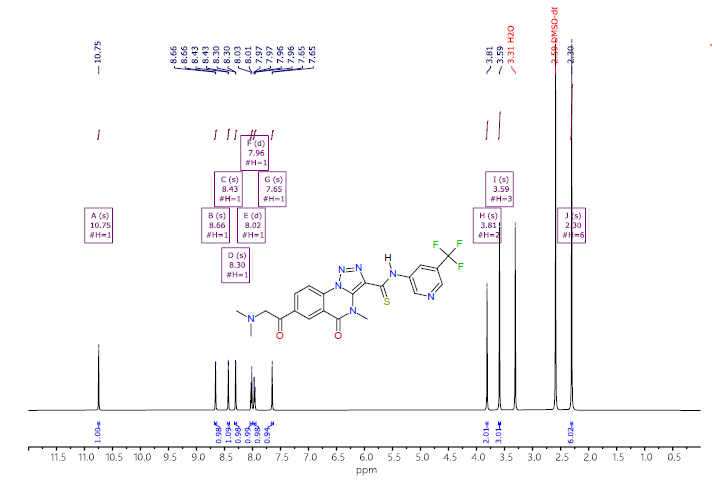


**13C NMR of 7-(dimethylglycyl)-4-methyl-5-oxo-N-(5-(trifluoromethyl)pyridin-3-yl)-4,5-dihydro-[1,2,3]triazolo[1,5-a]quinazoline-3-carbothioamide (8h)**


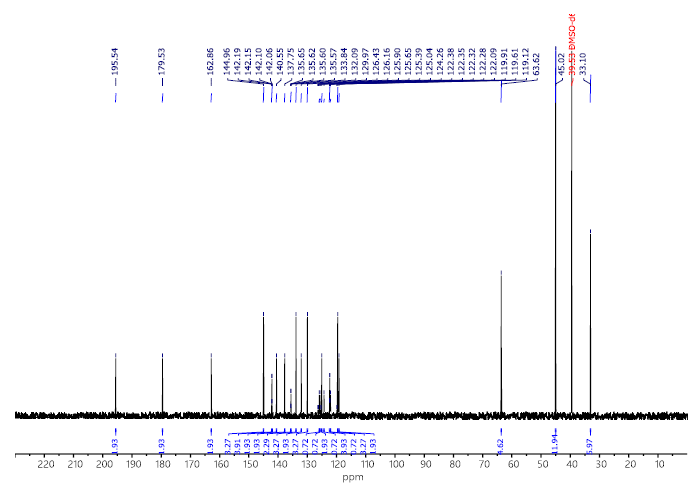


**HRMS of 7-(dimethylglycyl)-4-methyl-5-oxo-N-(5-(trifluoromethyl)pyridin-3-yl)-4,5-dihydro-[1,2,3]triazolo[1,5-a]quinazoline-3-carbothioamide (8h)**


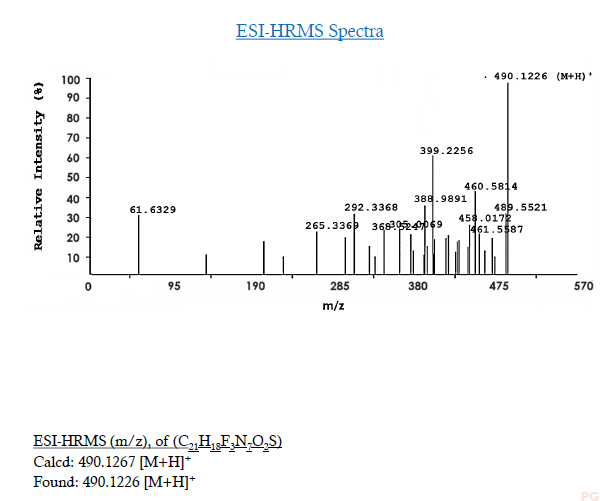


**1H NMR of N-(5-chloropyridin-3-yl)-7-(dimethylglycyl)-4-ethyl-5-oxo-4,5-dihydro-[1,2,3]triazolo[1,5-a]quinazoline-3-carbothioamide (8i)**


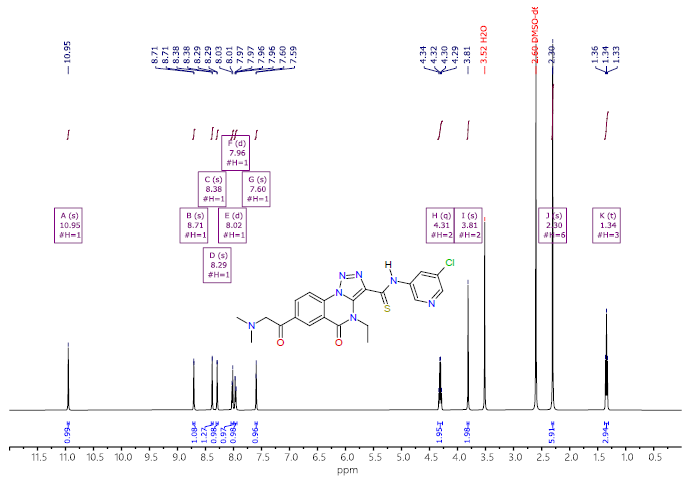


**13C NMR of N-(5-chloropyridin-3-yl)-7-(dimethylglycyl)-4-ethyl-5-oxo-4,5-dihydro-[1,2,3]triazolo[1,5-a]quinazoline-3-carbothioamide (8i)**


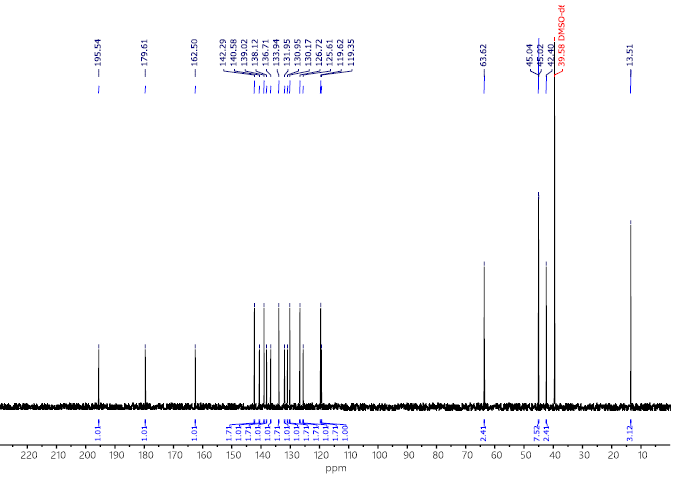


**HRMS of N-(5-chloropyridin-3-yl)-7-(dimethylglycyl)-4-ethyl-5-oxo-4,5-dihydro-[1,2,3]triazolo[1,5-a]quinazoline-3-carbothioamide (8i)**


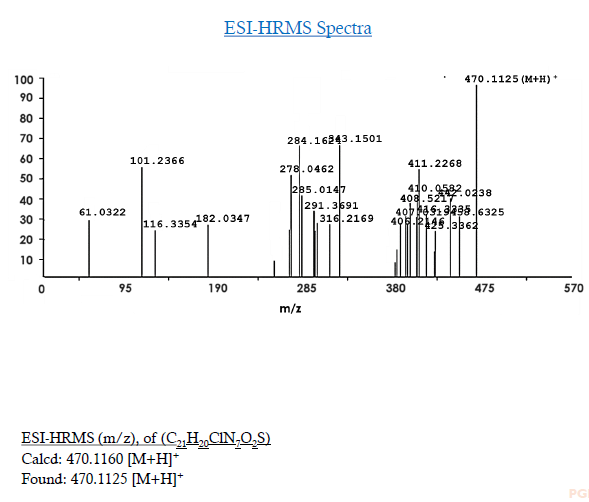


**1H NMR 7-(dimethylglycyl)-4-methyl-N-(4-methylpyridin-3-yl)-5-oxo-4,5-dihydro-[1,2,3]triazolo[1,5-a]quinazoline-3-carbothioamide (8j)**


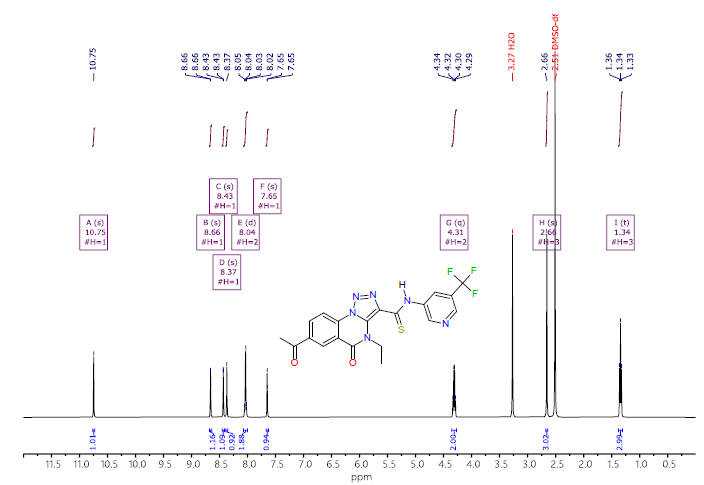


**13C NMR 7-(dimethylglycyl)-4-methyl-N-(4-methylpyridin-3-yl)-5-oxo-4,5-dihydro-[1,2,3]triazolo[1,5-a]quinazoline-3-carbothioamide (8j)**


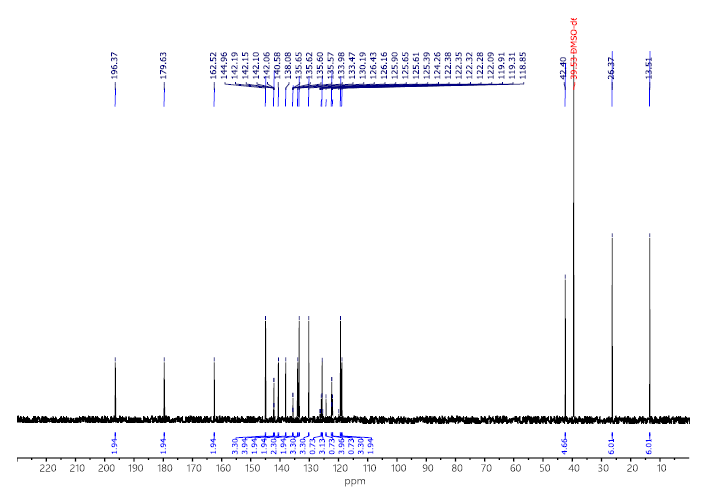


**HRMS of 7-(dimethylglycyl)-4-methyl-N-(4-methylpyridin-3-yl)-5-oxo-4,5-dihydro-[1,2,3]triazolo[1,5-a]quinazoline-3-carbothioamide (8j)**


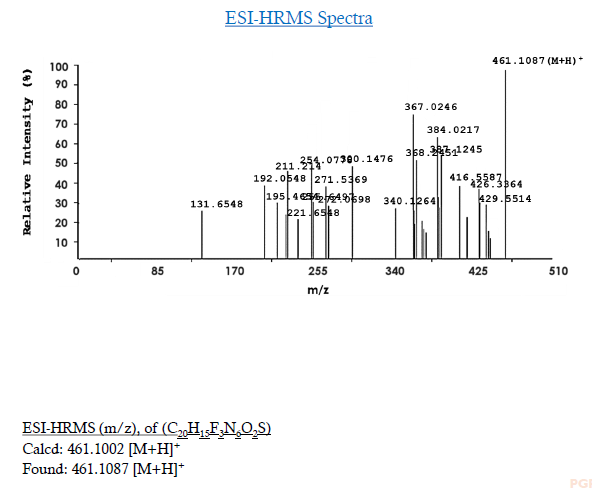


**1H NMR of 7-(dimethylglycyl)-4-methyl-N-(5-methylpyridin-3-yl)-5-oxo-4,5-dihydro-[1,2,3]triazolo[1,5-a]quinazoline-3-carbothioamide (8k)**


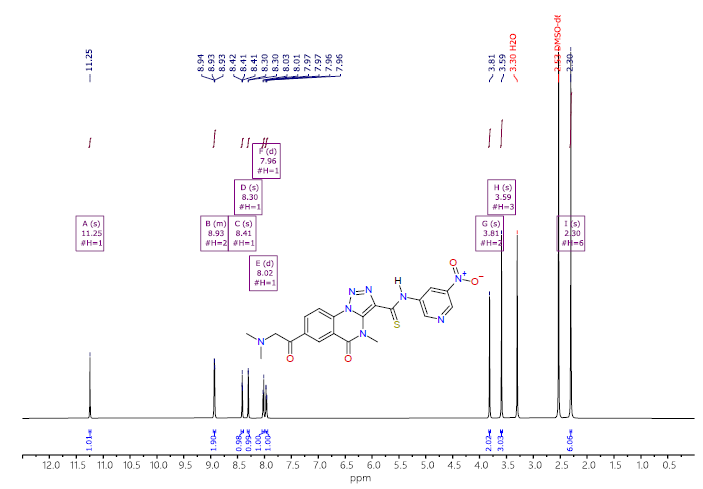


**13C NMR of 7-(dimethylglycyl)-4-methyl-N-(5-methylpyridin-3-yl)-5-oxo-4,5-dihydro-[1,2,3]triazolo[1,5-a]quinazoline-3-carbothioamide (8k)**


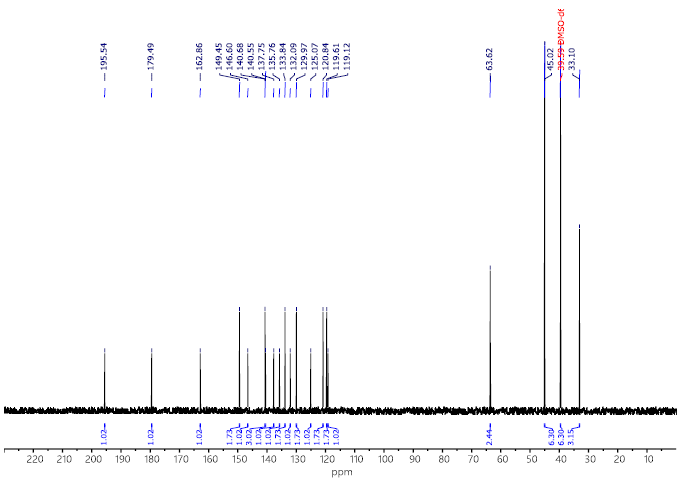


**HRMS of 7-(dimethylglycyl)-4-methyl-N-(5-methylpyridin-3-yl)-5-oxo-4,5-dihydro-[1,2,3]triazolo[1,5-a]quinazoline-3-carbothioamide (8k)**

**
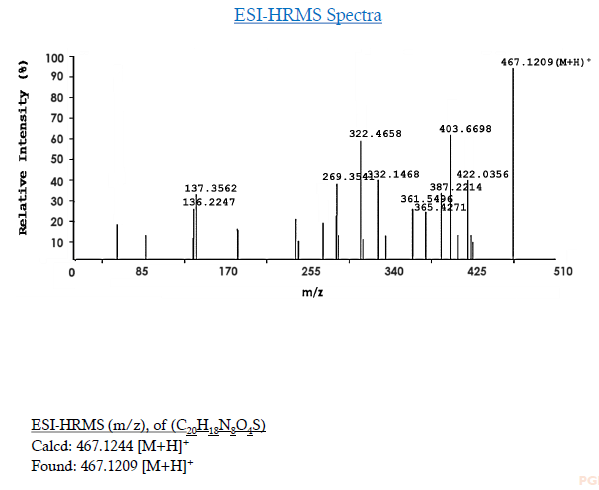
**
